# Supplementary material for: Domain Specificity in Visual Cortex
Source: Oxford University Press journal article supplement (doi:10.1093/cercor/bhj086), 2005-12-07
Supplement: bhj086_Supplementary_Data.zip [file bhj086_Supplementary_Data.zip]

Archive with 4 entries (4 files):
- bhj086supp4.pdf
- bhj086supp3.pdf
- bhj086supp2.doc
- bhj086supp1.jpg
