# Supplementary material for: Domain Specificity in Visual Cortex
Source: Oxford University Press journal article supplement (doi:10.1093/cercor/bhj086), 2005-12-07
Supplement: bhj086_Supplementary_Data.zip [file bhj086_Supplementary_Data.zip › bhj086supp3.pdf]

|                           |                 |                       |     |     |        |         |         |                                      |   | birds | bodies | cars  | chairs | clothes | crystals | faces | fish  | flowers | fruit+veg | insects | instruments | mammals | microbes | prepared food | reptiles | scenes | spiders | tools | weapons |
|---------------------------|-----------------|-----------------------|-----|-----|--------|---------|---------|--------------------------------------|---|-------|--------|-------|--------|---------|----------|-------|-------|---------|-----------|---------|-------------|---------|----------|---------------|----------|--------|---------|-------|---------|
|                           |                 | Avg. Talairach Coord. |     |     |        |         |         |                                      |   |       |        |       |        |         |          |       |       |         |           |         |             |         |          |               |          |        |         |       |         |
|                           | mm <sup>3</sup> | X                     | Y   | Z   | max(T) | mean(T) | p       | Region                               |   |       |        |       |        |         |          |       |       |         |           |         |             |         |          |               |          |        |         |       |         |
| birds-all                 |                 |                       |     |     |        |         |         |                                      |   |       |        |       |        |         |          |       |       |         |           |         |             |         |          |               |          |        |         |       |         |
| 1                         | 642             | 42                    | -72 | 1   | 7.4    | 5.3     | 0.00038 | R. occipitotemporal                  |   | 4.88  | 5.65   | 2.71  | 3.50   | 3.86    | 2.45     | 3.79  | 3.19  | 3.65    | 3.01      | 4.53    | 3.16        | 4.76    | 2.60     | 3.40          | 4.31     | 2.16   | 4.25    | 3.61  | 3.69    |
| 2                         | 50              | 25                    | 23  | 57  | 5.1    | 4.7     | 0.00072 | R. dorsal prefrontal                 |   | 1.02  | -0.40  | -0.47 | 0.39   | 0.68    | 0.52     | -0.39 | -0.26 | 0.49    | -0.02     | 0.43    | -0.11       | -0.71   | 0.04     | 0.53          | -0.38    | -0.24  | -0.35   | -0.90 | -0.27   |
| bodies-all                |                 |                       |     |     |        |         |         |                                      |   |       |        |       |        |         |          |       |       |         |           |         |             |         |          |               |          |        |         |       |         |
| 1                         | 1748            | 46                    | -67 | 1   | 10.9   | 7.0     | 0.00004 | R. occipital temporal                | * | 3.69  | 4.70   | 1.84  | 2.45   | 3.16    | 1.66     | 2.83  | 2.41  | 2.59    | 2.14      | 3.52    | 2.45        | 3.48    | 1.92     | 2.33          | 3.37     | 1.19   | 3.34    | 2.75  | 2.95    |
| 2                         | 455             | 42                    | -49 | -14 | 7.2    | 6.3     | 0.00006 | R. fusiform gyrus                    |   | 2.43  | 3.62   | 2.02  | 1.61   | 2.63    | 1.65     | 3.59  | 1.86  | 1.78    | 2.26      | 2.51    | 2.13        | 2.67    | 1.86     | 2.38          | 2.55     | 2.01   | 2.65    | 1.83  | 2.09    |
| 3                         | 30              | 37                    | -68 | 12  | 6.4    | 6.0     | 0.00009 | R. occipitotemporal                  |   | 1.35  | 2.52   | 0.87  | 1.25   | 1.44    | 0.62     | 1.33  | 0.82  | 1.19    | 0.97      | 1.53    | 1.39        | 1.41    | 0.58     | 1.02          | 1.53     | 1.45   | 1.34    | 1.52  | 1.21    |
| 4                         | 378             | -49                   | -72 | 0   | 8.7    | 6.7     | 0.00005 | L. occipitotemporal                  |   | 4.11  | 5.29   | 2.73  | 2.70   | 2.94    | 2.48     | 2.78  | 3.21  | 3.11    | 3.18      | 3.65    | 3.68        | 4.47    | 2.26     | 2.76          | 4.37     | 1.82   | 4.26    | 4.17  | 3.91    |
| 5                         | 20              | -52                   | -67 | 6   | 6.2    | 6.0     | 0.00009 | L. occipitotemporal                  |   | 2.28  | 3.29   | 1.24  | 0.57   | 1.66    | 1.16     | 1.47  | 1.48  | 1.44    | 1.46      | 2.53    | 2.03        | 2.08    | 1.24     | 1.13          | 2.52     | 0.80   | 1.85    | 2.54  | 2.41    |
| cars-all                  |                 |                       |     |     |        |         |         |                                      |   |       |        |       |        |         |          |       |       |         |           |         |             |         |          |               |          |        |         |       |         |
| 1                         | 587             | 24                    | -88 | -3  | 7.7    | 5.2     | 0.00045 | R. posterior occipital               |   | 4.83  | 4.44   | 5.98  | 5.58   | 4.24    | 5.30     | 4.64  | 4.55  | 5.75    | 5.27      | 5.54    | 4.80        | 4.43    | 5.19     | 6.33          | 4.82     | 4.77   | 6.18    | 4.00  | 4.20    |
| 2                         | 21              | 2                     | -36 | -12 | 5.2    | 4.7     | 0.00069 | R. colliculus                        |   | -0.94 | -0.69  | 0.93  | -0.99  | -0.73   | -0.39    | -0.64 | 0.79  | 0.18    | 0.39      | -0.82   | 0.72        | -0.61   | -0.81    | -0.06         | 0.04     | -0.13  | -0.41   | -0.56 | -0.95   |
| chairs-all                |                 |                       |     |     |        |         |         |                                      |   |       |        |       |        |         |          |       |       |         |           |         |             |         |          |               |          |        |         |       |         |
| 1                         | 161             | 29                    | -83 | 12  | 5.2    | 4.7     | 0.00066 | R. posterior occipital               |   | 3.16  | 3.98   | 2.37  | 4.74   | 3.64    | 2.98     | 2.39  | 2.05  | 3.77    | 3.29      | 3.60    | 3.28        | 2.57    | 3.65     | 5.34          | 2.70     | 6.36   | 3.60    | 2.86  | 3.30    |
| 2                         | 872             | 25                    | -44 | -6  | 6.9    | 5.1     | 0.00047 | R. collateral sulcus                 |   | 0.32  | 0.43   | 0.56  | 2.02   | 1.15    | 1.02     | -0.14 | -0.05 | 0.93    | 0.96      | 0.68    | 1.06        | -0.12   | 1.40     | 1.78          | 0.14     | 4.03   | -0.32   | 0.56  | 0.60    |
| 3                         | 13              | 22                    | -80 | 20  | 4.8    | 4.6     | 0.00082 | R. intraparietal sulcus              |   | 0.45  | 0.86   | 0.20  | 1.57   | 1.05    | 0.67     | 0.42  | 0.14  | 0.51    | 0.66      | 0.88    | 0.87        | 0.30    | 0.53     | 1.26          | 0.37     | 2.16   | 0.47    | 0.61  | 0.74    |
| 4                         | 17              | 23                    | -12 | -11 | 5.1    | 4.6     | 0.00075 | R. anterior hippocampus / amygdala   |   | 0.57  | 0.45   | 0.46  | 1.11   | 0.91    | 0.63     | 0.43  | 0.16  | 0.06    | 0.74      | 1.29    | 0.44        | 0.45    | 0.39     | 1.39          | 0.55     | 0.44   | 0.29    | -0.07 | 1.04    |
| 5                         | 31              | -25                   | -40 | -17 | 5.1    | 4.6     | 0.00074 | L. collateral sulcus                 |   | 0.93  | 0.71   | 1.17  | 2.05   | 1.43    | 1.20     | 0.11  | 0.84  | 0.91    | 1.70      | 1.59    | 1.85        | 0.29    | 1.59     | 2.12          | 0.92     | 2.25   | 1.07    | 1.17  | 1.28    |
| 6                         | 226             | -29                   | -88 | 15  | 5.4    | 4.7     | 0.00067 | L. intraparietal sulcus              |   | 3.66  | 3.95   | 2.88  | 5.13   | 3.41    | 3.69     | 2.00  | 2.55  | 4.03    | 3.80      | 3.52    | 3.80        | 3.51    | 3.66     | 5.24          | 3.18     | 5.58   | 3.84    | 3.81  | 3.05    |
| clothes-all               |                 |                       |     |     |        |         |         |                                      |   |       |        |       |        |         |          |       |       |         |           |         |             |         |          |               |          |        |         |       |         |
| 1                         | 14              | 59                    | -20 | 21  | 5.3    | 4.7     | 0.00072 | R. angular gyrus                     |   | -0.40 | -0.67  | -0.67 | -0.43  | 0.28    | -0.52    | -0.67 | -0.56 | -0.42   | -0.45     | 0.14    | -0.43       | -0.78   | -0.13    | -0.41         | -0.50    | -0.35  | -0.57   | -0.62 | -0.12   |
| 2                         | 128             | 47                    | -69 | 2   | 6.6    | 5.1     | 0.00047 | R. post. occipitotemporal            |   | 4.46  | 5.72   | 2.16  | 2.81   | 3.84    | 1.88     | 2.99  | 3.13  | 3.11    | 2.45      | 4.22    | 2.91        | 4.42    | 2.32     | 2.54          | 4.27     | 1.09   | 4.27    | 3.18  | 3.52    |
| 3                         | 12              | 38                    | 13  | 40  | 4.9    | 4.6     | 0.00080 | R. middle frontal gyrus              |   | 0.19  | -0.25  | -0.51 | -0.11  | 0.63    | 0.39     | 0.45  | -0.64 | -0.40   | -0.71     | -0.34   | -0.89       | -0.43   | -0.03    | -0.54         | -0.27    | 0.23   | -0.22   | -0.35 | -0.54   |
| 4                         | 28              | 19                    | 31  | 60  | 5.2    | 4.8     | 0.00056 | R. superior frontal gyrus            |   | 1.16  | 0.25   | -0.20 | 0.46   | 1.44    | 0.97     | 0.23  | 0.33  | 1.24    | 0.49      | 1.03    | 0.41        | 0.18    | 1.18     | 1.01          | 0.34     | 0.21   | 0.50    | -0.07 | 0.25    |
| 5                         | 28              | 18                    | 67  | 20  | 5.2    | 4.8     | 0.00064 | R. frontal pole                      |   | 1.14  | 0.59   | 0.34  | 1.08   | 1.55    | 0.25     | 0.26  | 0.59  | 0.32    | 0.34      | 0.97    | 0.23        | 0.47    | 0.83     | 0.62          | 0.25     | 0.43   | 0.42    | 0.07  | 0.64    |
| 6                         | 61              | 6                     | -65 | 29  | 4.9    | 4.6     | 0.00082 | R. posterior precuneus               |   | -0.32 | -1.08  | -1.21 | -0.15  | 0.39    | -1.22    | -0.91 | -0.52 | -0.44   | -1.03     | -0.44   | -0.72       | -1.04   | -0.74    | -1.36         | -1.50    | -0.94  | -1.24   | -1.50 | -1.40   |
| 7                         | 31              | 6                     | -89 | 21  | 5.5    | 4.8     | 0.00060 | R. medial posterior occipital        |   | -1.58 | -0.47  | -1.49 | 0.37   | 0.65    | -0.21    | -0.39 | -1.11 | -0.35   | -0.65     | 0.08    | -0.51       | -0.43   | 0.11     | 0.36          | -1.32    | 1.40   | -0.70   | -1.81 | -1.92   |
| 8                         | 31              | -1                    | -79 | 22  | 4.8    | 4.5     | 0.00085 | medial occipital                     |   | -3.46 | -4.00  | -3.31 | -2.22  | -1.55   | -2.59    | -3.17 | -2.90 | -2.48   | -3.19     | -2.20   | -3.05       | -3.39   | -2.90    | -3.20         | -3.33    | -2.22  | -3.23   | -4.04 | -4.27   |
| 9                         | 392             | -9                    | -88 | 14  | 6.6    | 5.1     | 0.00044 | L. posterior occipital               |   | -2.01 | -2.07  | -2.35 | -1.17  | -0.80   | -1.49    | -1.93 | -1.74 | -1.45   | -1.66     | -1.13   | -1.89       | -1.60   | -1.61    | -1.32         | -2.00    | -0.83  | -2.39   | -2.15 | -2.19   |
| 10                        | 252             | -12                   | 67  | 15  | 5.9    | 4.9     | 0.00055 | L. frontal pole                      |   | 0.94  | 0.58   | 0.51  | 0.68   | 1.64    | 0.25     | 0.43  | 0.30  | 0.65    | 0.21      | 1.14    | 0.52        | 0.19    | 0.99     | 0.85          | 0.34     | 0.45   | 0.29    | 0.45  | 0.41    |
| 11                        | 18              | -9                    | -89 | 26  | 4.7    | 4.6     | 0.00084 | L. posterior occipital lobe          |   | -1.86 | -1.67  | -1.77 | -0.67  | -0.64   | -1.17    | -1.94 | -1.72 | -1.30   | -1.42     | -1.01   | -1.92       | -1.59   | -1.56    | -1.18         | -2.08    | -0.52  | -1.64   | -1.85 | -2.28   |
| 12                        | 46              | -23                   | 40  | 46  | 5.1    | 4.7     | 0.00069 | L. superior frontal sulcus           |   | 1.02  | -0.08  | -0.01 | 0.55   | 1.35    | 0.67     | -0.56 | -0.21 | 1.13    | 0.11      | 0.58    | -0.24       | 0.07    | 1.22     | 0.53          | 0.27     | -0.19  | -0.29   | -0.52 | 0.31    |
| crystals-all              |                 |                       |     |     |        |         |         |                                      |   |       |        |       |        |         |          |       |       |         |           |         |             |         |          |               |          |        |         |       |         |
| 1                         | 80              | 13                    | -90 | -14 | 5.5    | 4.8     | 0.00064 | R. posterior occipital lobe          |   | 2.02  | 1.89   | 3.73  | 2.99   | 2.01    | 3.96     | 3.20  | 3.17  | 3.12    | 3.30      | 3.99    | 2.75        | 2.05    | 2.95     | 4.03          | 2.66     | 3.67   | 4.35    | 2.08  | 1.56    |
| 2                         | 15              | 12                    | -80 | -16 | 5.1    | 4.7     | 0.00071 | R. inferior posterior occipital lobe |   | 1.73  | 1.57   | 2.89  | 2.53   | 2.26    | 3.92     | 2.17  | 2.18  | 3.06    | 3.20      | 3.36    | 1.81        | 1.70    | 3.68     | 4.18          | 2.09     | 4.01   | 3.11    | 1.14  | 0.96    |
| 3                         | 186             | -14                   | -93 | 0   | 5.4    | 4.7     | 0.00066 | L. posterior occipital lobe          |   | 2.60  | 1.68   | 2.75  | 3.94   | 2.69    | 4.35     | 3.22  | 2.32  | 4.00    | 3.83      | 3.52    | 2.09        | 2.66    | 3.66     | 4.78          | 2.26     | 4.95   | 2.79    | 2.13  | 1.23    |
| 4                         | 11              | -46                   | -71 | 33  | 5.3    | 4.8     | 0.00063 | L. lateral occipitotemporal          |   | 0.56  | 0.56   | 0.34  | 0.36   | 0.69    | 0.95     | 0.02  | 0.38  | -0.01   | 0.52      | 0.81    | 0.40        | 0.20    | 0.03     | 0.58          | 0.03     | 0.05   | 0.20    | -0.13 | -0.10   |
| 5                         | 34              | -47                   | -64 | 30  | 6.8    | 4.9     | 0.00058 | L. lateral occipitotemporal          |   | 0.61  | 0.55   | 0.60  | 0.38   | 0.88    | 0.87     | 0.19  | 0.78  | 0.28    | 0.47      | 0.80    | 0.85        | -0.06   | 0.19     | 0.56          | 0.34     | 0.27   | 0.64    | 0.07  | 0.15    |
| faces-all                 |                 |                       |     |     |        |         |         |                                      |   |       |        |       |        |         |          |       |       |         |           |         |             |         |          |               |          |        |         |       |         |
| 1                         | 1197            | 41                    | -46 | 15  | 6.4    | 4.9     | 0.00057 | R. post. superior temporal sulcus    |   | -0.11 | 0.19   | -0.28 | -0.23  | -0.10   | -0.32    | 0.62  | -0.26 | -0.36   | 0.02      | -0.02   | -0.17       | -0.30   | -0.32    | -0.29         | -0.29    | -0.03  | -0.07   | -0.05 | -0.17   |
| 2                         | 369             | 45                    | 9   | 36  | 6.0    | 4.9     | 0.00055 | R. inferior frontal sulcus           |   | 0.56  | 1.11   | -0.11 | 0.54   | 1.06    | 0.68     | 1.83  | 0.19  | -0.03   | 1.09      | 1.03    | 0.77        | 0.35    | 0.62     | 0.94          | 0.17     | 1.01   | 1.05    | 0.27  | 0.72    |
| 3                         | 21              | 40                    | -8  | 61  | 4.8    | 4.6     | 0.00072 | R. dorsal precentral gyrus           |   | 0.35  | 1.05   | 0.58  | 0.20   | 0.31    | 0.56     | 1.71  | 0.74  | 0.73    | 1.08      | 0.72    | 0.79        | 0.76    | 0.06     | 1.03          | 0.30     | 1.23   | 1.01    | 0.69  | 0.28    |
| 4                         | 11              | 41                    | -38 | -21 | 4.8    | 4.6     | 0.00078 | R. fusiform gyrus                    |   | 0.54  | 1.78   | 0.47  | 0.22   | 0.68    | 0.51     | 1.84  | 0.29  | -0.14   | 0.49      | 0.84    | 0.68        | 1.07    | -0.06    | 0.73          | 0.64     | 0.76   | 0.98    | 0.75  | 0.32    |
| 5                         | 114             | 37                    | -8  | 50  | 5.8    | 4.8     | 0.00059 | R. precentral sulcus                 |   | 0.26  | 0.57   | 0.15  | 0.09   | 0.29    | -0.12    | 0.93  | -0.06 | 0.07    | 0.25      | 0.26    | 0.17        | 0.04    | 0.04     | 0.04          | 0.08     | 0.59   | 0.00    | 0.44  | 0.33    |
| 6                         | 318             | 37                    | -1  | 35  | 8.2    | 5.4     | 0.00038 | R. precentral sulcus                 |   | 0.46  | 0.85   | 0.51  | 0.32   | 0.96    | 0.35     | 1.67  | 0.45  | 0.72    | 1.03      | 0.67    | 0.95        | 0.62    | 0.78     | 0.41          | 0.67     | 0.76   | 0.77    | 0.21  | 0.42    |
| 7                         | 21              | 29                    | 19  | 24  | 5.1    | 4.7     | 0.00071 | R. anterior insula                   |   | -0.20 | 0.17   | -0.03 | -0.30  | -0.04   | -0.32    | 0.53  | -0.09 | -0.62   | -0.05     | 0.19    | -0.14       | -0.39   | -0.20    | 0.08          | -0.22    | -0.21  | -0.01   | -0.13 | 0.00    |
| 8                         | 27              | -8                    | -2  | 2   | 4.8    | 4.6     | 0.00081 | white matter                         |   | -0.54 | 0.01   | -0.69 | -0.25  | 0.17    | -0.69    | 0.35  | -0.46 | -0.48   | -0.31     | -0.18   | -0.64       | -0.92   | -0.33    | 0.03          | -1.05    | 0.03   | -0.45   | 0.05  | -0.17   |
| 9                         | 111             | -24                   | -29 | 7   | 5.8    | 4.7     | 0.00066 | white matter                         |   | -0.01 | 0.48   | 0.07  | -0.15  | -0.25   | -0.19    | 0.66  | 0.17  | -0.56   | 0.29      | 0.48    | 0.01        | -0.09   | -0.34    | 0.25          | -0.36    | 0.32   | 0.16    | 0.33  | -0.09   |
| fish-all (no activations) |                 |                       |     |     |        |         |         |                                      |   |       |        |       |        |         |          |       |       |         |           |         |             |         |          |               |          |        |         |       |         |
| flowers-all               |                 |                       |     |     |        |         |         |                                      |   |       |        |       |        |         |          |       |       |         |           |         |             |         |          |               |          |        |         |       |         |
| 1                         | 265             | 18                    | -84 | -2  | 6.9    | 4.9     | 0.00052 | R. posterior occipital lobe          |   | 2.52  | 1.85   | 3.13  | 3.18   | 2.26    | 3.30     | 2.37  | 2.42  | 3.30    | 3.03      | 3.03    | 2.19        | 2.38    | 3.06     | 3.62          | 2.60     | 3.08   | 3.00    | 1.88  | 1.93    |
| 2                         | 11              | -19                   | -87 | -2  | 4.6    | 4.5     | 0.00087 | L. posterior occipital lobe          |   | 3.33  | 2.37   | 3.81  |        |         |          |       |       |         |           |         |             |         |          |               |          |        |         |       |         |

|                                   |      |     |     |     |      |     |         |                               |   |       |       |       |       |       |       |       |       |       |       |       |       |       |       |       |       |       |       |       |       |
|-----------------------------------|------|-----|-----|-----|------|-----|---------|-------------------------------|---|-------|-------|-------|-------|-------|-------|-------|-------|-------|-------|-------|-------|-------|-------|-------|-------|-------|-------|-------|-------|
| 3                                 | 11   | -52 | -19 | -12 | 5.1  | 4.7 | 0.00075 | L. anterior temporal lobe     |   | -0.25 | -0.11 | -0.15 | -0.25 | 0.43  | 0.02  | 0.02  | -0.17 | 0.70  | 0.15  | -0.06 | -0.17 | -0.26 | 0.17  | -0.27 | -0.22 | 0.07  | 0.06  | 0.10  | -0.28 |
| <b>prepared food-all</b>          |      |     |     |     |      |     |         |                               |   |       |       |       |       |       |       |       |       |       |       |       |       |       |       |       |       |       |       |       |       |
| 1                                 | 149  | 41  | -30 | 62  | 8.4  | 5.6 | 0.00035 | R. lateral central sulcus     |   | 0.45  | 0.14  | -0.04 | 0.53  | 0.33  | 0.27  | 0.30  | 0.51  | 0.36  | 0.28  | 0.80  | 0.38  | 0.12  | 0.46  | 1.19  | -0.16 | 0.05  | 0.16  | 0.40  | 0.23  |
| 2                                 | 7226 | 24  | -81 | -8  | 11.6 | 5.9 | 0.00027 | R. posterior occipital lobe   | * | 4.17  | 4.15  | 4.95  | 4.93  | 3.97  | 4.93  | 4.12  | 3.91  | 5.14  | 4.83  | 4.99  | 4.15  | 4.01  | 5.04  | 6.16  | 3.99  | 5.28  | 5.03  | 3.27  | 3.48  |
| 3                                 | 1827 | 25  | -46 | -14 | 8.8  | 5.5 | 0.00037 | R. collateral sulcus          |   | 2.21  | 2.41  | 2.58  | 3.79  | 3.18  | 3.08  | 1.51  | 2.20  | 3.00  | 3.47  | 2.98  | 3.15  | 2.05  | 3.54  | 4.58  | 2.39  | 4.86  | 2.06  | 2.36  | 2.57  |
| 4                                 | 44   | 26  | 0   | -15 | 5.5  | 4.7 | 0.00067 | R. amygdala                   |   | 0.14  | 0.68  | -0.03 | 0.75  | 0.74  | 0.75  | 0.47  | 0.11  | 0.63  | 0.27  | 0.91  | -0.10 | 0.31  | 0.78  | 1.38  | 0.23  | 0.49  | 0.18  | 0.25  | 0.45  |
| 5                                 | 75   | 6   | -80 | -19 | 5.4  | 4.7 | 0.00071 | R. ventral medial occipital   |   | 0.66  | 0.54  | 1.06  | 1.64  | 1.49  | 1.69  | 1.41  | 0.88  | 1.93  | 2.16  | 2.03  | 1.03  | 3.80  | 2.48  | 2.82  | 1.23  | 2.62  | 1.94  | 0.37  | 0.25  |
| 6                                 | 12   | 5   | -30 | 57  | 4.9  | 4.7 | 0.00071 | R. paracentral lobule         |   | 0.09  | 0.05  | 0.27  | 0.27  | -0.30 | 0.55  | -0.12 | 0.64  | 0.04  | 0.26  | 0.27  | 0.58  | -0.20 | 0.54  | 1.09  | 0.86  | 0.36  | 0.22  | 0.20  | -0.32 |
| 7                                 | 49   | -3  | 60  | 16  | 5.4  | 4.7 | 0.00071 | L. frontal pole               |   | 1.11  | 0.53  | 0.17  | 0.58  | 1.34  | 0.21  | 0.19  | 0.57  | 0.83  | 0.29  | 1.36  | 0.42  | 0.02  | 1.11  | 1.49  | 0.04  | 0.20  | 0.67  | 0.15  | 0.16  |
| 8                                 | 107  | -10 | -53 | 64  | 8.2  | 5.2 | 0.00043 | L. post central gyrus         |   | -0.08 | -0.21 | -0.55 | 0.65  | 0.39  | 0.05  | -0.99 | -0.33 | 0.11  | -0.31 | 0.91  | -0.16 | -0.51 | -0.09 | 0.75  | 0.06  | -0.26 | -0.05 | -0.93 | 0.26  |
| 9                                 | 173  | -12 | -84 | -15 | 6.1  | 4.8 | 0.00061 | L. ventral medial occipital   |   | 1.58  | 1.18  | 2.87  | 2.54  | 1.84  | 3.10  | 2.62  | 2.49  | 2.62  | 2.73  | 3.56  | 2.00  | 1.28  | 2.80  | 4.29  | 1.66  | 3.96  | 3.01  | 0.87  | 0.92  |
| 10                                | 674  | -18 | 31  | 54  | 7.6  | 5.2 | 0.00040 | L. superior frontal sulcus    |   | 0.99  | 0.78  | 1.16  | 0.86  | 1.48  | 1.10  | 0.47  | 0.42  | 0.99  | 0.57  | 1.39  | 0.89  | 0.56  | 1.33  | 1.98  | 0.95  | 0.28  | 0.75  | 0.16  | 0.32  |
| 11                                | 2464 | -24 | -83 | -7  | 7.8  | 5.1 | 0.00047 | L. posterior occipital        |   | 3.39  | 3.02  | 3.84  | 4.01  | 2.90  | 3.99  | 3.05  | 3.17  | 4.10  | 3.91  | 3.92  | 3.36  | 3.21  | 3.96  | 4.85  | 3.27  | 4.28  | 3.86  | 2.94  | 2.45  |
| 12                                | 29   | -18 | -45 | 63  | 5.2  | 4.7 | 0.00066 | L. post central gyrus         |   | 0.57  | -0.36 | 0.04  | 0.49  | 0.42  | 0.19  | -0.35 | -0.18 | 0.32  | -0.08 | 0.83  | 0.36  | -0.09 | 0.20  | 0.91  | 0.43  | -0.08 | 0.20  | -0.30 | 0.72  |
| 13                                | 89   | -20 | 34  | -1  | 6.9  | 4.9 | 0.00056 | L. orbital frontal            |   | -0.12 | -0.42 | -0.14 | 0.34  | 0.22  | 0.26  | -0.71 | -0.03 | 0.46  | 0.00  | 0.47  | -0.12 | -0.17 | 0.71  | 0.96  | 0.13  | -0.50 | -0.21 | -0.65 | 0.06  |
| 14                                | 32   | -19 | 3   | -10 | 5.3  | 4.7 | 0.00067 | L. orbitofrontal              |   | 0.39  | 0.08  | -0.13 | 0.35  | 0.48  | 0.46  | 0.22  | -0.23 | -0.08 | 0.50  | 1.10  | -0.21 | 0.14  | 0.05  | 1.25  | 0.05  | -0.34 | -0.14 | -0.47 | 0.56  |
| 15                                | 1977 | -29 | -52 | -15 | 8.3  | 5.4 | 0.00039 | L. collateral sulcus          |   | 2.71  | 2.54  | 3.20  | 4.20  | 3.25  | 3.84  | 1.84  | 2.86  | 3.89  | 4.30  | 3.67  | 3.86  | 2.44  | 4.35  | 5.55  | 2.97  | 5.34  | 3.43  | 3.11  | 2.87  |
| 16                                | 125  | -31 | -16 | -10 | 5.6  | 4.8 | 0.00064 | L. anterior hippocampus       |   | 0.34  | 0.54  | 0.30  | 0.64  | 0.50  | 0.40  | 0.49  | 0.28  | 0.24  | 0.50  | 0.86  | 0.45  | 0.26  | 0.61  | 1.27  | 0.12  | 0.35  | 0.03  | 0.27  | 0.59  |
| 17                                | 16   | -40 | -29 | 63  | 5.6  | 4.9 | 0.00053 | L. lateral post central gyrus |   | 0.61  | 0.22  | 0.06  | 0.47  | 0.56  | 0.82  | 0.57  | 0.55  | 0.35  | 0.77  | 0.59  | 0.55  | 0.65  | 0.75  | 1.26  | 0.48  | 0.26  | 0.50  | 0.71  | 0.89  |
| 18                                | 111  | -41 | -67 | -15 | 5.8  | 4.9 | 0.00057 | L. inferior occipital lobe    |   | 4.60  | 4.77  | 4.76  | 3.90  | 4.37  | 4.16  | 4.38  | 3.93  | 4.32  | 4.66  | 4.61  | 4.65  | 4.10  | 4.90  | 5.64  | 4.55  | 3.34  | 4.46  | 4.36  | 3.85  |
| <b>fruit &amp; vegetables-all</b> |      |     |     |     |      |     |         |                               |   |       |       |       |       |       |       |       |       |       |       |       |       |       |       |       |       |       |       |       |       |
| 1                                 | 227  | 42  | -30 | 0   | 7.2  | 5.1 | 0.00047 | R. superior temporal sulcus   |   | -0.34 | -0.38 | 0.06  | -0.03 | -0.42 | 0.06  | -0.17 | 0.18  | -0.32 | 0.41  | -0.16 | 0.31  | -0.32 | -0.49 | -0.33 | 0.02  | -0.16 | 0.00  | -0.25 | -0.52 |
| 2                                 | 185  | 24  | -59 | -31 | 6.7  | 5.1 | 0.00046 | R. cerebellum                 |   | 0.02  | -1.85 | 0.39  | -0.01 | 0.28  | -0.41 | -2.07 | -0.63 | -0.48 | 0.91  | 0.05  | 0.85  | -0.84 | 0.29  | -0.08 | -0.86 | -0.55 | 0.30  | -0.93 | -0.27 |
| 3                                 | 17   | 19  | -17 | 15  | 5.2  | 4.7 | 0.00071 | R. basal ganglia              |   | 0.06  | -0.21 | 0.00  | 0.07  | -0.06 | -0.33 | 0.03  | -0.04 | -0.43 | 0.48  | 0.40  | 0.01  | -0.49 | -0.11 | 0.23  | -0.24 | -0.26 | -0.12 | -0.16 | 0.18  |
| 4                                 | 21   | 11  | -24 | 27  | 5.8  | 4.8 | 0.00059 | R. corpus callosum            |   | -0.74 | -0.73 | -0.15 | -0.17 | -0.36 | -0.30 | -0.03 | -0.03 | -0.43 | 0.75  | -0.37 | -0.06 | -0.02 | -0.38 | -0.14 | -0.37 | -0.58 | -0.33 | -0.25 | -0.29 |
| 5                                 | 16   | -7  | -14 | 27  | 4.7  | 4.6 | 0.00083 | L. corpus callosum            |   | -0.04 | -0.84 | -0.11 | 0.09  | -0.39 | 0.02  | -0.38 | 0.18  | -0.09 | 1.00  | -0.02 | 0.29  | 0.28  | 0.00  | 0.04  | 0.04  | -0.37 | 0.12  | -0.25 | 0.25  |
| 6                                 | 28   | -13 | -11 | 26  | 5.3  | 4.7 | 0.00069 | ventricle                     |   | -0.27 | -0.67 | -0.10 | -0.04 | -0.40 | 0.05  | -0.53 | -0.22 | -0.60 | 0.44  | 0.06  | -0.02 | 0.06  | -0.19 | -0.12 | -0.19 | -0.45 | -0.23 | -0.51 | -0.14 |
| 7                                 | 14   | -13 | -98 | 0   | 4.7  | 4.5 | 0.00089 | L. posterior occipital lobe   |   | 1.93  | 2.06  | 1.86  | 3.12  | 2.22  | 3.47  | 3.00  | 1.91  | 3.38  | 3.44  | 2.44  | 1.86  | 2.22  | 2.99  | 3.54  | 1.39  | 4.26  | 2.55  | 1.58  | 0.32  |
| 8                                 | 11   | -16 | -98 | -3  | 4.6  | 4.5 | 0.00091 | L. posterior occipital lobe   |   | 2.69  | 2.38  | 2.64  | 3.60  | 2.42  | 3.56  | 3.16  | 2.66  | 3.57  | 3.58  | 2.83  | 2.37  | 2.52  | 3.28  | 3.82  | 2.06  | 3.93  | 3.19  | 2.06  | 0.84  |
| 9                                 | 17   | -25 | 8   | 30  | 5.0  | 4.7 | 0.00069 | white matter                  |   | -0.42 | -0.08 | 0.11  | 0.19  | -0.22 | 0.03  | -0.01 | 0.01  | -0.45 | 0.52  | 0.14  | 0.32  | 0.09  | -0.32 | 0.32  | 0.35  | 0.12  | -0.05 | 0.05  | 0.01  |
| 10                                | 390  | -49 | -6  | 26  | 5.4  | 4.7 | 0.00069 | L. ventral precentral gyrus   |   | -0.08 | -0.04 | 0.20  | -0.18 | 0.09  | 0.11  | 0.03  | 0.52  | -0.17 | 0.85  | 0.12  | 0.70  | -0.01 | -0.03 | 0.09  | 0.28  | 0.07  | 0.43  | 0.08  | 0.05  |
| 11                                | 99   | -47 | -29 | -12 | 6.0  | 4.8 | 0.00059 | L. middle temporal lobe       |   | 0.05  | 0.24  | 0.18  | 0.02  | 0.30  | 0.21  | 0.07  | 0.21  | 0.09  | 0.68  | 0.31  | 0.58  | 0.16  | 0.16  | 0.36  | 0.23  | 0.28  | 0.12  | 0.02  | -0.04 |
| 12                                | 81   | -57 | -29 | 32  | 6.5  | 4.9 | 0.00058 | L. lateral postcentral gyrus  |   | -0.33 | -0.20 | -0.29 | -0.33 | 0.04  | -0.62 | -0.20 | -0.17 | 0.09  | 0.47  | 0.18  | 0.19  | -0.47 | 0.06  | -0.67 | 0.19  | -0.36 | -0.09 | 0.60  | 0.59  |
| <b>insects-all</b>                |      |     |     |     |      |     |         |                               |   |       |       |       |       |       |       |       |       |       |       |       |       |       |       |       |       |       |       |       |       |
| 1                                 | 941  | 44  | -71 | 2   | 6.1  | 4.9 | 0.00051 | R. occipitotemporal           |   | 4.45  | 5.44  | 2.29  | 3.02  | 3.58  | 2.04  | 3.35  | 2.93  | 3.15  | 2.53  | 4.20  | 2.83  | 4.30  | 2.28  | 2.80  | 4.03  | 1.71  | 3.98  | 3.31  | 3.40  |
| 2                                 | 26   | 45  | -47 | -30 | 5.1  | 4.7 | 0.00069 | R. cerebellum                 |   | 0.03  | -0.89 | -0.19 | -0.19 | -0.18 | -0.11 | -2.07 | -1.53 | -0.82 | 0.49  | 0.55  | -0.15 | 0.37  | -0.99 | 0.07  | 0.08  | -1.24 | -0.68 | -1.12 | -0.20 |
| 3                                 | 186  | 18  | -94 | -3  | 6.1  | 5.0 | 0.00049 | R. occipital pole             |   | 4.12  | 3.55  | 4.77  | 4.47  | 3.52  | 4.63  | 4.57  | 3.82  | 5.01  | 4.35  | 5.21  | 3.44  | 3.68  | 4.77  | 5.66  | 3.84  | 4.41  | 5.20  | 2.64  | 2.78  |
| 4                                 | 25   | 18  | -89 | -18 | 4.9  | 4.7 | 0.00072 | R. inferior occipital lobe    |   | 1.81  | 1.59  | 2.84  | 2.45  | 1.53  | 2.52  | 2.50  | 2.46  | 2.35  | 2.38  | 3.21  | 2.43  | 1.64  | 2.36  | 3.26  | 2.02  | 2.47  | 3.43  | 1.57  | 1.75  |
| 5                                 | 82   | 7   | -45 | 66  | 5.8  | 4.8 | 0.00059 | R. post central gyrus         |   | 0.17  | 0.00  | -0.06 | 0.39  | 0.42  | 0.12  | -0.43 | 0.08  | 0.21  | -0.23 | 0.87  | 0.29  | -0.11 | 0.27  | 0.51  | 0.26  | -0.17 | 0.20  | -0.46 | -0.18 |
| 6                                 | 52   | 1   | 13  | 11  | 5.3  | 4.7 | 0.00069 | ventricle                     |   | -0.40 | -0.41 | -0.60 | -0.03 | -0.18 | -0.36 | -0.84 | -0.55 | -0.59 | -0.32 | 0.54  | -0.14 | 0.43  | -0.06 | 0.52  | -0.29 | -0.86 | -0.13 | -0.82 | -0.06 |
| 7                                 | 26   | -5  | -92 | 13  | 5.2  | 4.6 | 0.00074 | L. medial occipital           |   | -2.10 | -1.61 | -3.04 | -0.82 | -0.37 | -1.58 | -1.50 | -1.87 | -1.18 | -1.89 | -0.45 | -2.11 | -1.50 | -1.21 | -0.65 | -2.62 | -0.11 | -2.66 | -2.14 | -2.07 |
| 8                                 | 231  | -9  | -33 | 42  | 5.8  | 4.9 | 0.00056 | L. middle cingulate sulcus    |   | -0.54 | -0.10 | -0.73 | -0.07 | -0.09 | -0.03 | 0.42  | -0.28 | -0.44 | -0.36 | 0.45  | -0.19 | -2.10 | -0.38 | -0.14 | -1.68 | 0.20  | -0.42 | -0.08 | -1.10 |
| 9                                 | 68   | -10 | -56 | 66  | 5.8  | 4.8 | 0.00062 | L. medial post central gyrus  |   | -0.36 | -0.20 | -0.44 | 0.59  | 0.18  | 0.13  | -1.28 | -0.35 | -0.32 | -0.44 | 0.94  | -0.31 | -0.47 | -0.04 | 0.51  | 0.19  | -0.73 | 0.02  | -0.93 | 0.07  |
| 10                                | 21   | -13 | 25  | 6   | 5.0  | 4.7 | 0.00071 | white matter                  |   | -0.04 | -0.11 | -0.05 | 0.08  | 0.08  | 0.20  | -0.44 | -0.11 | -0.11 | -0.06 | 0.40  | 0.08  | -0.16 | 0.18  | 0.12  | 0.05  | -0.24 | -0.15 | -0.26 | -0.06 |
| 11                                | 104  | -11 | 20  | -6  | 5.1  | 4.6 | 0.00079 | L. orbitofrontal              |   | 0.13  | -0.13 | -0.21 | 0.00  | 0.20  | 0.01  | -0.29 | -0.19 | 0.20  | -0.09 | 0.53  | -0.22 | -0.41 | 0.20  | 0.18  | -0.31 | -0.17 | -0.23 | -0.19 | 0.13  |
| 12                                | 40   | -16 | 62  | 17  | 5.1  | 4.6 | 0.00080 | L. frontal pole               |   | 0.41  | 0.00  | 0.15  | 0.45  | 1.04  | -0.07 | 0.08  | -0.12 | 0.07  | 0.01  | 1.12  | 0.19  | -0.02 | 0.50  | 0.58  | 0.04  | 0.08  | -0.20 | 0.04  | 0.24  |
| 13                                | 74   | -17 | -47 | 63  | 5.2  | 4.6 | 0.00079 | L. post central sulcus        |   | 0.37  | -0.33 | 0.03  | 0.33  | 0.19  | 0.18  | -0.35 | -0.13 | 0.22  | -0.06 | 0.85  | 0.35  | -0.14 | 0.09  | 0.69  | 0.45  | -0.21 | 0.23  | -0.30 | 0.55  |
| 14                                | 97   | -18 | -3  | -10 | 5.3  | 4.7 | 0.00067 | L. amygdala                   |   | 0.88  | 0.66  | 0.12  | 1.25  | 1.33  | 0.85  | 0.90  | 0.31  | 0.65  | 0.97  | 2.05  | 0.26  | 0.56  | 0.98  | 2.39  | 0.51  | 0.05  | 0.34  | -0.03 | 1.42  |
| 15                                | 13   | -19 | -15 | -5  | 4.9  | 4.6 | 0.00078 | white matter                  |   | 0.28  | 0.56  | -0.02 | 0.41  | 0.42  |       |       |       |       |       |       |       |       |       |       |       |       |       |       |       |

|              |      |     |     |     |      |      |         |                                     |   |       |       |       |       |       |       |       |       |       |       |       |       |       |       |       |       |       |       |       |       |
|--------------|------|-----|-----|-----|------|------|---------|-------------------------------------|---|-------|-------|-------|-------|-------|-------|-------|-------|-------|-------|-------|-------|-------|-------|-------|-------|-------|-------|-------|-------|
| 5            | 118  | -34 | -58 | 2   | 6.7  | 5.1  | 0.00046 | ventricle                           |   | 0.50  | 0.50  | 0.39  | 0.55  | 0.50  | 0.65  | 0.32  | 0.78  | 0.42  | 0.96  | 0.57  | 1.09  | 0.36  | 0.49  | 0.79  | 0.65  | 0.36  | 0.54  | 0.88  | 0.85  |
| 6            | 275  | -48 | -32 | 8   | 6.5  | 5.0  | 0.00054 | L. Heschl's gyrus                   |   | 0.11  | -0.32 | -0.05 | -0.23 | 0.02  | 0.27  | -0.34 | -0.09 | 0.07  | -0.03 | -0.19 | 0.50  | -0.06 | -0.24 | 0.05  | 0.30  | -0.21 | -0.02 | -0.39 | -0.36 |
| mammals-all  |      |     |     |     |      |      |         |                                     |   |       |       |       |       |       |       |       |       |       |       |       |       |       |       |       |       |       |       |       |       |
| 1            | 372  | 45  | -71 | 0   | 10.5 | 5.7  | 0.00036 | R. occipitotemporal                 | * | 4.80  | 5.86  | 2.52  | 3.20  | 3.92  | 2.17  | 3.43  | 3.30  | 3.44  | 2.73  | 4.52  | 3.12  | 4.83  | 2.50  | 3.00  | 4.42  | 1.56  | 4.43  | 3.39  | 3.67  |
| 2            | 42   | 39  | -43 | -18 | 5.1  | 4.6  | 0.00076 | R. fusiform gyrus                   |   | 2.15  | 3.55  | 2.06  | 1.26  | 1.96  | 1.66  | 3.86  | 1.57  | 0.93  | 1.95  | 1.99  | 2.00  | 3.08  | 1.17  | 1.93  | 2.43  | 1.80  | 2.42  | 1.53  | 1.48  |
| microbes-all |      |     |     |     |      |      |         |                                     |   |       |       |       |       |       |       |       |       |       |       |       |       |       |       |       |       |       |       |       |       |
| 1            | 95   | 21  | -37 | -16 | 5.5  | 4.7  | 0.00067 | R. collateral sulcus                |   | 1.14  | 1.30  | 1.66  | 2.32  | 1.86  | 1.94  | 0.77  | 0.97  | 1.91  | 1.97  | 1.57  | 1.86  | 1.01  | 2.47  | 2.69  | 1.46  | 3.43  | 1.02  | 1.47  | 1.62  |
| 2            | 11   | 17  | 10  | 21  | 5.6  | 4.8  | 0.00066 | white matter                        |   | -0.20 | -0.46 | -0.47 | -0.32 | 0.03  | -0.54 | -0.41 | -0.15 | 0.20  | -0.26 | 0.08  | -0.35 | -0.50 | 0.38  | -0.21 | -0.32 | -0.50 | -0.62 | -0.29 | -0.33 |
| 3            | 60   | -12 | -20 | -30 | 5.7  | 4.9  | 0.00053 | L. pons                             |   | 0.44  | -0.64 | 0.36  | 0.35  | 0.33  | -0.37 | -1.25 | -0.13 | 1.09  | 0.23  | 0.75  | 0.02  | -0.19 | 0.86  | 0.13  | 0.43  | -0.08 | -0.11 | -0.34 | 0.14  |
| 4            | 12   | -10 | -72 | 35  | 5.1  | 4.7  | 0.00069 | L. precuneus                        |   | -0.80 | -1.28 | -1.21 | -0.88 | -0.59 | -1.49 | -1.42 | -0.89 | -1.12 | -1.24 | -0.37 | -0.97 | -1.43 | -0.36 | -1.43 | -0.88 | -0.55 | -1.19 | -1.14 | -1.42 |
| 5            | 16   | -16 | -28 | -21 | 4.8  | 4.6  | 0.00081 | L. cerebellum                       |   | 0.13  | 0.04  | 0.23  | -0.03 | 0.44  | 0.24  | -1.16 | -0.01 | 0.78  | -0.32 | 0.47  | 0.07  | 0.44  | 1.68  | 1.20  | 0.77  | 0.11  | -0.95 | -0.14 | 0.47  |
| 6            | 143  | -31 | -76 | -29 | 5.2  | 4.7  | 0.00067 | L. cerebellum                       |   | 2.08  | 2.21  | 2.80  | 2.02  | 1.91  | 2.40  | 1.17  | 1.29  | 2.93  | 2.98  | 2.60  | 1.00  | 2.14  | 3.14  | 2.48  | 1.65  | 1.28  | 2.78  | 0.54  | 1.39  |
| 7            | 126  | -33 | -71 | -19 | 5.8  | 4.8  | 0.00059 | L. ventral occipital                |   | 3.67  | 3.63  | 4.22  | 3.66  | 3.58  | 4.49  | 3.56  | 3.63  | 4.12  | 4.26  | 4.49  | 3.76  | 3.92  | 4.73  | 5.15  | 3.62  | 4.46  | 3.81  | 3.07  | 2.56  |
| 8            | 12   | -34 | 6   | -28 | 4.9  | 4.6  | 0.00073 | L. temporal pole                    |   | 0.51  | 0.06  | 0.07  | 0.49  | 0.71  | 0.52  | -0.27 | -0.21 | 0.79  | -0.11 | 0.59  | 0.09  | 0.30  | 0.95  | 0.73  | 0.01  | -0.03 | -0.70 | -0.43 | 0.22  |
| 9            | 25   | -37 | -4  | 41  | 5.4  | 4.7  | 0.00074 | L. middle frontal gyrus             |   | 0.53  | 0.16  | 0.16  | -0.12 | 0.60  | 0.23  | 0.45  | 0.14  | 0.14  | 0.22  | 0.47  | 0.77  | 0.02  | 0.91  | -0.07 | 0.40  | 0.34  | 0.20  | 0.18  | 0.15  |
| 10           | 14   | -40 | 1   | 40  | 5.0  | 4.7  | 0.00072 | L. inferior frontal sulcus          |   | 0.99  | 0.74  | 0.49  | -0.05 | 0.83  | 0.55  | 0.87  | 0.58  | 0.13  | 1.22  | 0.69  | 1.37  | 0.43  | 1.34  | 0.35  | 0.79  | 0.89  | 0.60  | 0.41  | 0.36  |
| 11           | 22   | -56 | -40 | 1   | 5.1  | 4.7  | 0.00070 | L. middle temporal gyrus            |   | 0.26  | 0.15  | 0.36  | 0.21  | 1.05  | 0.50  | -0.01 | -0.21 | 0.72  | -0.09 | 0.55  | 0.61  | -0.11 | 0.86  | 0.46  | 0.22  | 0.16  | 0.14  | -0.16 | 0.53  |
| reptiles-all |      |     |     |     |      |      |         |                                     |   |       |       |       |       |       |       |       |       |       |       |       |       |       |       |       |       |       |       |       |       |
| 1            | 249  | 13  | -59 | 67  | 6.5  | 4.9  | 0.00052 | R. superior parietal lobe           |   | -0.59 | -0.38 | 0.24  | -0.25 | -0.47 | -0.20 | -0.54 | 0.17  | -0.65 | 0.07  | -0.22 | 0.28  | -0.49 | -0.19 | -0.48 | 0.98  | -0.79 | 0.51  | -0.25 | -0.83 |
| scenes-all   |      |     |     |     |      |      |         |                                     |   |       |       |       |       |       |       |       |       |       |       |       |       |       |       |       |       |       |       |       |       |
| 1            | 176  | 25  | -76 | 10  | 9.7  | 8.1  | 0.00001 | R. post. intraparietal sulcus / TOS | * | 1.03  | 1.88  | 1.55  | 3.16  | 0.97  | 0.81  | 1.48  | 1.13  | 1.39  | 1.43  | 1.57  | 0.98  | 1.65  | 1.46  | 1.30  | 1.49  | 1.68  | 2.52  | 1.63  | 2.09  |
| 2            | 2483 | 20  | -46 | -6  | 26.8 | 10.9 | 0.00000 | R. parahippocampal                  | * | -0.19 | -0.02 | 0.14  | 1.18  | 0.56  | 0.55  | -0.29 | -0.41 | 0.31  | 0.38  | 0.24  | 0.54  | -0.54 | 0.62  | 1.01  | -0.31 | 3.47  | -0.61 | -0.03 | -0.05 |
| 3            | 19   | 14  | -54 | 9   | 8.2  | 7.8  | 0.00001 | R. parieto-occipital fissure        |   | -1.13 | -1.37 | -1.26 | -0.61 | -0.77 | -0.76 | -0.72 | -0.99 | -1.15 | -0.92 | -0.99 | -0.97 | -1.43 | -1.25 | -0.96 | -1.37 | 1.81  | -1.35 | -1.33 | -1.81 |
| 4            | 47   | 11  | -87 | -3  | 11.3 | 8.6  | 0.00001 | R. calcarine sulcus                 | * | 1.44  | -0.40 | 1.96  | 2.22  | 1.47  | 2.82  | 1.43  | 1.50  | 2.46  | 2.38  | 2.52  | 0.37  | 1.47  | 2.51  | 3.42  | 1.41  | 3.35  | 1.74  | 0.09  | 0.43  |
| 5            | 16   | -2  | -80 | -6  | 8.1  | 7.8  | 0.00001 | medial occipital                    |   | -2.49 | -2.27 | -2.48 | -1.27 | -0.97 | -1.31 | -1.08 | -1.91 | -1.12 | -1.27 | -0.47 | -1.98 | -2.11 | -1.23 | -1.02 | -1.94 | 0.83  | -1.88 | -2.49 | -2.40 |
| 6            | 708  | -11 | -92 | 2   | 10.0 | 8.3  | 0.00001 | L. cuneus                           | * | 0.00  | -0.06 | 0.12  | 1.42  | 0.90  | 1.51  | 1.08  | 0.05  | 1.46  | 1.20  | 1.25  | 0.12  | 0.26  | 1.31  | 1.77  | -0.11 | 2.91  | 0.35  | -0.10 | -0.59 |
| 7            | 69   | -7  | -78 | -12 | 9.0  | 8.0  | 0.00001 | medial occipital                    |   | -0.80 | -0.96 | -0.83 | 0.74  | 0.32  | 0.51  | 0.26  | -0.43 | 0.57  | 0.26  | 1.24  | -0.66 | -0.68 | 0.52  | 1.10  | -0.55 | 2.13  | -0.16 | -1.35 | -1.36 |
| 8            | 1918 | -22 | -48 | -6  | 14.7 | 9.2  | 0.00000 | L. parahippocampal                  | * | -0.59 | -0.33 | -0.16 | 0.86  | 0.20  | 0.21  | -0.48 | -0.26 | 0.03  | 0.15  | -0.09 | 0.46  | -0.75 | 0.00  | 0.56  | -0.70 | 3.11  | -0.50 | 0.03  | -0.56 |
| 9            | 16   | -25 | -86 | 16  | 8.5  | 7.9  | 0.00001 | L. post. intraparietal sulcus / TOS |   | 2.32  | 2.73  | 1.49  | 3.70  | 2.52  | 2.53  | 1.15  | 1.20  | 2.77  | 2.51  | 2.48  | 2.45  | 2.26  | 2.59  | 3.88  | 1.79  | 4.58  | 2.10  | 2.61  | 1.92  |
| spiders-all  |      |     |     |     |      |      |         |                                     |   |       |       |       |       |       |       |       |       |       |       |       |       |       |       |       |       |       |       |       |       |
| 1            | 10   | 53  | -29 | 35  | 4.9  | 4.6  | 0.00082 | R. inferior parietal lobule         |   | -0.79 | -0.44 | -0.37 | -0.66 | -0.13 | -0.63 | -0.25 | -0.20 | -0.54 | 0.01  | -0.17 | -0.36 | -0.98 | -0.59 | -0.59 | -0.21 | -0.55 | 0.04  | -0.29 | -0.47 |
| 2            | 50   | 26  | -92 | -2  | 4.8  | 4.6  | 0.00075 | R. occipital pole                   |   | 4.73  | 4.46  | 5.46  | 4.98  | 4.35  | 4.70  | 4.31  | 4.45  | 5.60  | 5.04  | 5.23  | 4.83  | 4.34  | 4.99  | 5.65  | 4.52  | 4.23  | 6.02  | 3.49  | 3.77  |
| 3            | 113  | 25  | -88 | -10 | 4.8  | 4.6  | 0.00081 | R. occipital pole                   |   | 3.72  | 3.45  | 5.10  | 4.35  | 3.39  | 4.44  | 3.84  | 3.86  | 4.49  | 4.42  | 4.46  | 4.32  | 3.44  | 4.09  | 4.97  | 3.95  | 3.67  | 5.45  | 3.27  | 3.32  |
| 4            | 191  | -25 | -93 | -11 | 7.2  | 5.4  | 0.00036 | L. occipital pole                   |   |       |       |       |       |       |       |       |       |       |       |       |       |       |       |       |       |       |       |       |       |

**Supplementary Table 1.** All activations above minimum extent threshold of 10 mm<sup>3</sup>, from a random-effects multiple regression analysis. Contrasts were tested at a threshold of  $p < 0.001$  ( $T \geq 4.43$ ) except for scenes vs all others ( $T = 7.65$ ;  $p < 0.00001$ ) and bodies vs. all others ( $T = 5.875$ ;  $p < 0.0001$ ). Each row gives the volume of the activation, the location of the peak voxel of that activation in Talairach coordinates, the maximum and mean T value for the region, the associated  $p$  value for the region as a whole, and the approximate anatomical location of the activation peak. The final columns include for each activated cluster the response to all 20 categories, as measured by the parameter estimate from the regression analysis (see Materials and Methods). Entries indicated with an asterisk (\*) survived a threshold of  $p < 0.05$  corrected for multiple comparisons at the whole-brain level.
