# Supplementary material for: Domain Specificity in Visual Cortex
Source: Oxford University Press journal article supplement (doi:10.1093/cercor/bhj086), 2005-12-07
Supplement: bhj086_Supplementary_Data.zip [file bhj086_Supplementary_Data.zip › bhj086supp4.pdf]

|                             | N (out of 12) |       | Max Response |         | any > preferred? |       | Mean Coords |     |     |       |     |     |
|-----------------------------|---------------|-------|--------------|---------|------------------|-------|-------------|-----|-----|-------|-----|-----|
|                             | Left          | Right | Left         | Right   | Left             | Right | Left        |     |     | Right |     |     |
|                             |               |       |              |         |                  |       | X           | Y   | Z   | X     | Y   | Z   |
| <b>near FFA</b>             |               |       |              |         |                  |       |             |     |     |       |     |     |
| Mammals-[all others]        | -             | 12    | -            | faces   | -                | no    | -           | -   | -   | 37    | -48 | -14 |
| Bodies-[all others]         | -             | 11    | -            | clothes | -                | no    | -           | -   | -   | 39    | -47 | -14 |
| <b>near PPA</b>             |               |       |              |         |                  |       |             |     |     |       |     |     |
| Chairs-[all others]         | 11            | 12    | scenes       | scenes  | no               | no    | -25         | -50 | -7  | 24    | -45 | -7  |
| Prepared Foods-[all others] | 11            | 11    | scenes       | scenes  | no               | no    | -28         | -53 | -11 | 26    | -50 | -11 |
| <b>near EBA</b>             |               |       |              |         |                  |       |             |     |     |       |     |     |
| Mammals-[all others]        | 11            | 10    | bodies       | bodies  | no               | no    | -46         | -72 | 2   | 43    | -67 | 4   |
| Clothes-[all others]        | -             | 10    | -            | bodies  | -                | no    | -           | -   | -   | 49    | -64 | 0   |
| Birds-[all others]          | 11            | 11    | bodies       | bodies  | no               | no    | -43         | -72 | 2   | 44    | -65 | 2   |

Supplementary Figure 2. Results of individual-participant ROI analyses of activations appearing near the FFA, PPA, or EBA. For each contrast the number of participants in which an ROI could be identified is given, followed by the category that produced the maximal response in that region. The next column indicates whether the response to any category was significantly greater than to faces (in the fusiform region), scenes (in the parahippocampal region), or bodies (in the posterior inferior temporal sulcus region). The final columns give the average Talairach coordinates of these ROIs. These results indicate that although several categories significantly activate the cortex in and around the FFA, PPA, and EBA, in each case only faces, scenes, or bodies ever produce the maximal response.
