# Supplementary figures and images for: Domain Specificity in Visual Cortex
Source: Oxford University Press journal article supplement (doi:10.1093/cercor/bhj086), 2005-12-07

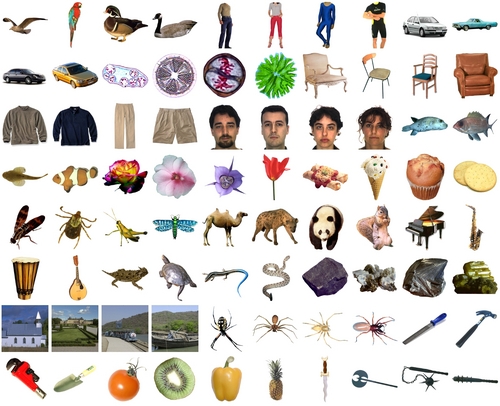

Supplement: bhj086_Supplementary_Data.zip [file bhj086_Supplementary_Data.zip › bhj086supp1.jpg]
